# Supplementary material for: A computational model to understand mouse iron physiology and disease
Source: PubMed Central journal article supplement (PMC6334977; doi:10.1371/journal.pcbi.1006680), 2019-01-04
Supplement: pcbi.1006680.s002.pdf [file pcbi.1006680.s002.pdf]

**S1 Table** – List of all model parameters including their values, units, and a brief description of their role.

| Parameter                        | Status <sup>1</sup> | Value                                    | Unit                                          | Description                                                                                                                                                                                                   |
|----------------------------------|---------------------|------------------------------------------|-----------------------------------------------|---------------------------------------------------------------------------------------------------------------------------------------------------------------------------------------------------------------|
| <i>Vol</i> <sub>Duodenum</sub>   | ○                   | $3.84615 \times 10^{-5}$                 | <i>l</i>                                      | Volume of the duodenum compartment                                                                                                                                                                            |
| <i>Vol</i> <sub>RBC</sub>        | ○                   | $7.9 \times 10^{-4}$                     | <i>l</i>                                      | Volume of the RBC compartment                                                                                                                                                                                 |
| <i>Vol</i> <sub>Spleen</sub>     | ○                   | $6.73077 \times 10^{-5}$                 | <i>l</i>                                      | Volume of the spleen compartment                                                                                                                                                                              |
| <i>Vol</i> <sub>Liver</sub>      | ○                   | $1.161905 \times 10^{-3}$                | <i>l</i>                                      | Volume of the liver compartment                                                                                                                                                                               |
| <i>Vol</i> <sub>Plasma</sub>     | ○                   | $1.3 \times 10^{-3}$                     | <i>l</i>                                      | Volume of the plasma compartment                                                                                                                                                                              |
| <i>Vol</i> <sub>BoneMarrow</sub> | ○                   | $2.14286 \times 10^{-4}$                 | <i>l</i>                                      | Volume of the bone marrow compartment                                                                                                                                                                         |
| <i>Vol</i> <sub>RestOfBody</sub> | ○                   | $1.96948 \times 10^{-2}$                 | <i>l</i>                                      | Volume of the “rest of body” compartment                                                                                                                                                                      |
| <i>kInDuo</i>                    | ▲                   | 0.397138                                 | <i>d</i> <sup>-1</sup>                        | 1 <sup>st</sup> order rate constant of iron transfer from Transferrin to Duodenum                                                                                                                             |
| <i>kInLiver</i>                  | ▲                   | 2.11666                                  | <i>d</i> <sup>-1</sup>                        | 1 <sup>st</sup> order rate constant of iron transfer from Transferrin to Liver                                                                                                                                |
| <i>kInRBC</i>                    | †                   | $5.03844 \times 10^{11}$                 | <i>d</i> <sup>-1</sup>                        | 1 <sup>st</sup> order rate constant of iron transfer from Bone Marrow to RBC                                                                                                                                  |
| <i>kInRest</i>                   | †                   | 4.78121                                  | <i>d</i> <sup>-1</sup>                        | 1 <sup>st</sup> order rate constant of iron transfer from Transferrin to “Rest of Body”                                                                                                                       |
| <i>kInBM</i>                     | †                   | $4.06878 \times 10^{12}$                 | <i>d</i> <sup>-1</sup>                        | 1 <sup>st</sup> order rate constant of iron transfer from Transferrin to Bone Marrow                                                                                                                          |
| <i>kDuoLoss</i>                  | ▲                   | $6.80738 \times 10^{-5}$                 | <i>d</i> <sup>-1</sup>                        | 1 <sup>st</sup> order rate constant of iron loss from Duodenum compartment                                                                                                                                    |
| <i>kRestLoss</i>                 | †                   | 0.0168620                                | <i>d</i> <sup>-1</sup>                        | 1 <sup>st</sup> order rate constant of iron loss from “Rest of Body” compartment                                                                                                                              |
| <i>kBMSpleen</i>                 | †                   | 0.103218                                 | <i>d</i> <sup>-1</sup>                        | 1 <sup>st</sup> order rate constant for transfer of iron from Bone Marrow to Spleen                                                                                                                           |
| <i>VDuoNTBI</i>                  | †                   | 0.200906                                 | <i>mol d</i> <sup>-1</sup>                    | Maximal rate of Ferroportin in Duodenum compartment (FPN <i>V</i> <sub>max</sub> )                                                                                                                            |
| <i>VLiverNTBI</i>                | †                   | 0.0444795                                | <i>mol d</i> <sup>-1</sup>                    | Maximal rate of Ferroportin in Liver compartment (FPN <i>V</i> <sub>max</sub> )                                                                                                                               |
| <i>VSpleenNTBI</i>               | †                   | 2.06738                                  | <i>mol d</i> <sup>-1</sup>                    | Maximal rate of Ferroportin in Spleen compartment (FPN <i>V</i> <sub>max</sub> )                                                                                                                              |
| <i>VRestNTBI</i>                 | ▲                   | 0.0101453                                | <i>mol d</i> <sup>-1</sup>                    | Maximal rate of Ferroportin in Rest of Body compartment (FPN <i>V</i> <sub>max</sub> )                                                                                                                        |
| <i>kRBCSpleen</i>                | ○                   | 0.03                                     | <i>d</i> <sup>-1</sup>                        | Steady state rate of transfer of iron from RBC to Spleen                                                                                                                                                      |
| <i>K<sub>m</sub>FeFPN</i>        | ▲                   | 0.112511                                 | <i>M</i>                                      | Michaelis constant of Ferroportin reactions                                                                                                                                                                   |
| <i>K<sub>i</sub>HepcidinFPN</i>  | ○                   | $6.3 \times 10^{-9}$                     | <i>M</i>                                      | Inhibition constant of Ferroportin reactions by Hepcidin                                                                                                                                                      |
| <i>vDiet</i>                     | †                   | $3.46965 \times 10^{-3}$                 | <i>M d</i> <sup>-1</sup>                      | Steady state rate of iron entry into duodenum (from diet)                                                                                                                                                     |
| <i>fDiet</i>                     | ▲<br>○<br>▲         | $1.29060 \times 10^{-6}$<br>1<br>3.11813 |                                               | Factor to adjust <i>vDiet</i> to the different levels of iron supply (deficient, adequate, and rich iron, in this order). The effective rate of dietary iron entry is the product <i>fDiet</i> × <i>vDiet</i> |
| <i>kNTBI_Fe1Tf</i>               | †                   | $1.00400 \times 10^9$                    | <i>M</i> <sup>-1</sup> <i>d</i> <sup>-1</sup> | Second order rate constant of NTBI binding to apoTransferrin                                                                                                                                                  |
| <i>kFe1Tf_Fe2Tf</i>              | ○                   | $1.00400 \times 10^9$                    | <i>M</i> <sup>-1</sup> <i>d</i> <sup>-1</sup> | Second order rate constant of NTBI binding to Fe1Tf                                                                                                                                                           |
| <i>k<sub>s</sub>Hepcidin</i>     | †                   | $3.98766 \times 10^{-4}$                 | <i>d</i> <sup>-1</sup>                        | 1 <sup>st</sup> order activation constant of Hepcidin synthesis by TotalFeTf                                                                                                                                  |
| <i>KEPOHepcidin</i>              | ○                   | $5.0 \times 10^{-12}$                    | <i>M</i>                                      | Inhibition constant of EPO on Hepcidin synthesis                                                                                                                                                              |
| <i>hEPOHepcidin</i>              | ○                   | 4                                        |                                               | Hill coefficient for inhibition of EPO on Hepcidin synthesis                                                                                                                                                  |
| <i>kdHepcidin</i>                | ○                   | 0.75616                                  | <i>d</i> <sup>-1</sup>                        | <i>v</i> order rate constant for degradation of Hepcidin                                                                                                                                                      |
| <i>VNTBILiver</i>                | ▲                   | 14.1511                                  | <i>M d</i> <sup>-1</sup>                      | Maximal rate of import of NTBI into the liver (ZIP14 <i>V</i> <sub>max</sub> )                                                                                                                                |
| <i>K<sub>m</sub>NTBI</i>         | ▲                   | $6.79291 \times 10^{-4}$                 | <i>M</i>                                      | Michaelis constant for NTBI entry into the liver (ZIP14 <i>K<sub>m</sub></i> )                                                                                                                                |

|                        |   |                          |                                |                                                                   |
|------------------------|---|--------------------------|--------------------------------|-------------------------------------------------------------------|
| <b><i>KaNTBI</i></b>   | ▲ | $2.55016 \times 10^{-4}$ | <b><i>M</i></b>                | Substrate activation constant for NTBI entry into the liver       |
| <b><i>vEPO</i></b>     | † | $2.62675 \times 10^{-9}$ | <b><i>M d<sup>-1</sup></i></b> | Maximal rate of synthesis of EPO (when [FeRBC]=0)                 |
| <b><i>hEPO</i></b>     | ○ | 6.5                      |                                | Hill coefficient for the inhibition of EPO synthesis by FeRBC     |
| <b><i>KiEPORBC</i></b> | ○ | 0.01                     | <b><i>M</i></b>                | Inhibition constant of EPO synthesis by FeRBC                     |
| <b><i>kdEPO</i></b>    | ○ | 4.8                      | <b><i>d<sup>-1</sup></i></b>   | 1 <sup>st</sup> order rate constant for the degradation of EPO    |
| <b><i>vTf</i></b>      | † | $1.54710 \times 10^{-5}$ | <b><i>M d<sup>-1</sup></i></b> | Rate of synthesis of Transferrin                                  |
| <b><i>kdTf</i></b>     | ○ | 0.4                      | <b><i>d<sup>-1</sup></i></b>   | 1 <sup>st</sup> order rate constant of degradation of Transferrin |
| <b><i>Injected</i></b> | ○ | $3.073 \times 10^{15}$   |                                | Number of radioactive ferrous ions injected (tracer)              |

<sup>1</sup>- parameters marked with a triangle (▲) were fit to the data, those marked with a dagger (†) were determined by steady state equations, and those marked with an open circle (○) were determined by other data or assumptions.
