# Supplementary material for: A computational model to understand mouse iron physiology and disease
Source: PubMed Central journal article supplement (PMC6334977; doi:10.1371/journal.pcbi.1006680), 2019-01-04
Supplement: pcbi.1006680.s003.pdf [file pcbi.1006680.s003.pdf]

**S2 Table** – List of model variables and their values in the steady state achieved with an adequate iron diet ( $v_{Diet}=3.4484 \times 10^{-3} \text{ M d}^{-1}$  and  $f_{Diet}=1$ ). This is also the initial condition for most of the simulations.

| Variable              | Status <sup>1</sup> | Value     | Unit | Description                                                                                                        |
|-----------------------|---------------------|-----------|------|--------------------------------------------------------------------------------------------------------------------|
| [FeRBC]               | †                   | 23        | mM   | Concentration of iron in RBC (iron mass = 0.997 mg)                                                                |
| [FeDuo]               | ▲                   | 10.0222   | mM   | Concentration of iron in duodenum (iron mass = 0.0218 mg)                                                          |
| [FeSpleen]            | ▲                   | 2.26838   | mM   | Concentration of iron in spleen (iron mass = 0.00823 mg)                                                           |
| [FeBM]                | ▲                   | 2.08051   | mM   | Concentration of iron in bone marrow (iron mass = 0.0257 mg)                                                       |
| [FeLiver]             | †                   | 1.3       | mM   | Concentration of iron in liver (iron mass = 0.0843 mg)                                                             |
| [FeRest]              | †                   | 0.40176   | mM   | Concentration of iron in “rest of body” (iron mass = 0.444 mg)                                                     |
| [Fe2Tf]               | †                   | 0.0189625 | mM   | Concentration of Fe2Tf species (2 Fe <sup>3+</sup> bound to Tf) (iron mass = 0.00270 mg)                           |
| [Tf]                  | †                   | 0.0116103 | mM   | Concentration of free transferrin                                                                                  |
| [Fe1Tf]               | †                   | 8.12714   | μM   | Concentration of Fe1Tf species (1 Fe <sup>3+</sup> bound to Tf) (iron mass = 0.0006 mg)                            |
| [NTBI]                | †                   | 40        | nM   | Concentration of NTBI (iron mass = 2.893 ng)                                                                       |
| [Hepcidin]            | †                   | 23.00092  | nM   | Concentration of Hepcidin                                                                                          |
| [EPO]                 | †                   | 2.4267    | pM   | Concentration of Erythropoietin                                                                                    |
| [All tracer species]  |                     | 0         | mM   | Concentration of all tracer species (FeDuo*, FeLiver*, FeRBC*, FeSpleen*, FeRest*, Fe1Tf*, Fe2Tf*, Fe2Tf**, NTBI*) |
| [FePlasma]            | ○                   | 0.0460921 | mM   | Total concentration of iron in plasma, sum of NTBI with all Tf-bound iron (iron mass = 0.00329 mg)                 |
| [TotalTf]             | ○                   | 0.0386999 | mM   | Total concentration of transferrin with and without iron bound (2.945 mg/ml)                                       |
| [TotalFe]             | ○                   | 1.59923   | mM   | Total iron concentration in the body (iron mass = 1.6 mg)                                                          |
| Tf <sub>sat</sub>     | ○                   | 59.499    | %    | Transferrin saturation (percentage of iron binding sites occupied in Tf)                                           |
| FeRBC transition time | ○                   | 33.3      | d    | Time for iron to transition through the RBC compartment (essentially the same as the average RBC lifetime)         |

<sup>1</sup> – items marked with a triangle (▲) were fit to the data, those marked with a dagger (†) were determined by steady state equations, and those marked with an open circle (○) were determined by other data or assumptions.
